# Supplementary material for: Maternal obesity-induced endoplasmic reticulum stress causes metabolic alterations and abnormal hypothalamic development in the offspring
Source: PubMed Central journal article supplement (PMC7067374; doi:10.1371/journal.pbio.3000296), 2020-03-12
Supplement: pbio.3000296.s001.pdf [file pbio.3000296.s001.pdf]

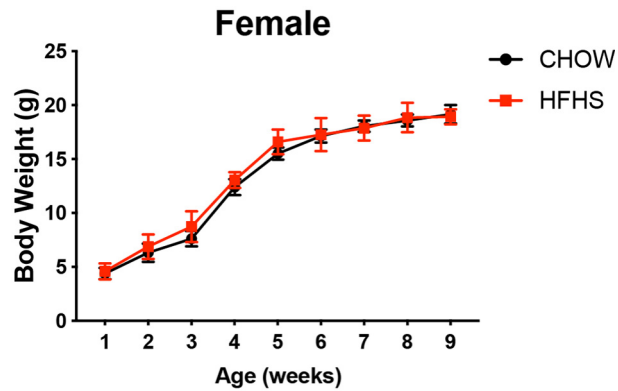

**S1 Fig. Maternal obesity does not affect body weight in the female offspring.** Body weight curves of female mice born to chow- or HFHS-fed dams (n = 5 per group). Data are presented as mean  $\pm$  SEM. Statistical significance was determined by a two-way ANOVA followed by Tukey's Multiple Comparison test. The underlying data are provided in S1 Data.
