# Supplementary material for: Maternal obesity-induced endoplasmic reticulum stress causes metabolic alterations and abnormal hypothalamic development in the offspring
Source: PubMed Central journal article supplement (PMC7067374; doi:10.1371/journal.pbio.3000296), 2020-03-12
Supplement: pbio.3000296.s003.pdf [file pbio.3000296.s003.pdf]

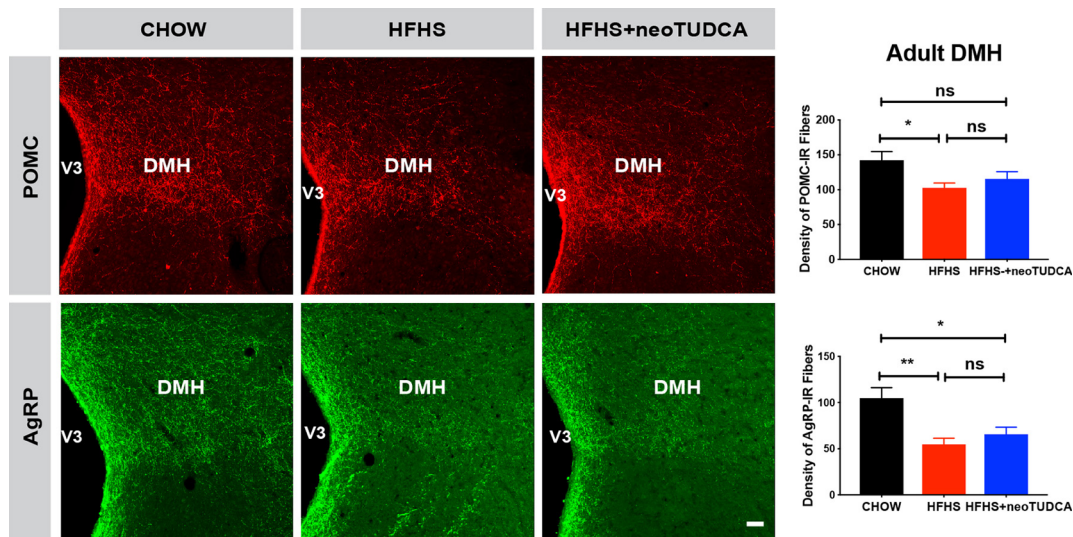

**S3 Fig. TUDCA treatment does not reverse maternal obesity-induced disruption of POMC and AgRP axonal projections to the dorsomedial nucleus.** Confocal images and quantification of the density of pro-opiomelanocortin (POMC)- and agouti-related peptide (AgRP)-immunoreactive fibers in the dorsomedial nucleus (DMH) of 10- to 12-week-old mice born to chow-fed dams, HFHS-fed dams, or HFHS-fed dams and treated with TUDCA neonatally (n = 5-7 per group). Data are presented as mean  $\pm$  SEM. \* $P \leq 0.05$ , and \*\* $P < 0.01$  versus other groups. Data are presented as mean + SEM. Statistical significance was determined by one-way ANOVA followed by Tukey's Multiple Comparison test. Scale bar, 50  $\mu$ m. The underlying data are provided in S1 Data.
